# Supplementary material for: Deciphering the Clinical Significance and Kinase Functions of GSK3α in Colon Cancer by Proteomics and Phosphoproteomics
Source: PubMed Central journal article supplement (PMC10196724; doi:10.1016/j.mcpro.2023.100545), 2023-04-08

supplemental Fig. S1

A

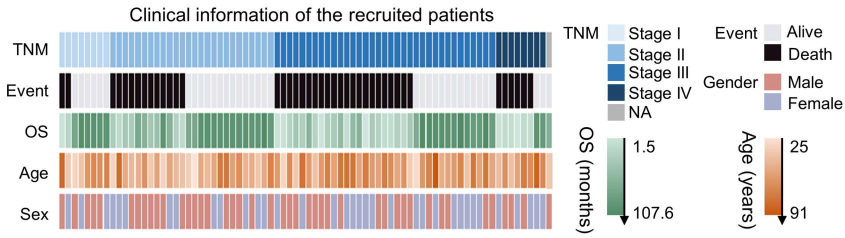

B

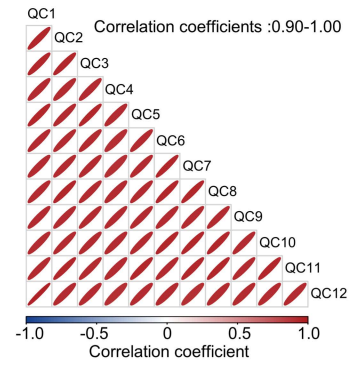

C

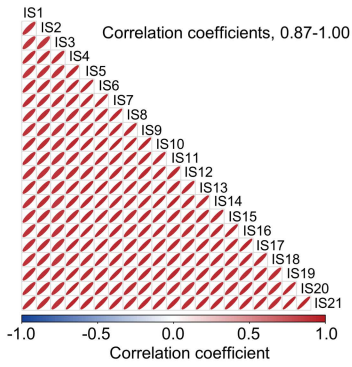

D

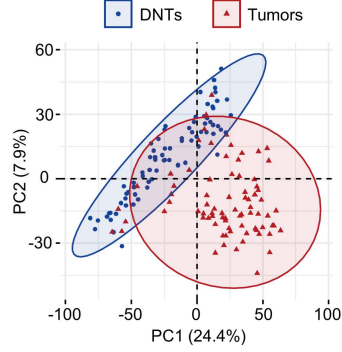

E

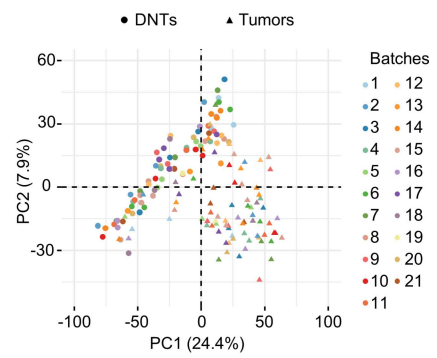

supplemental Fig. S2

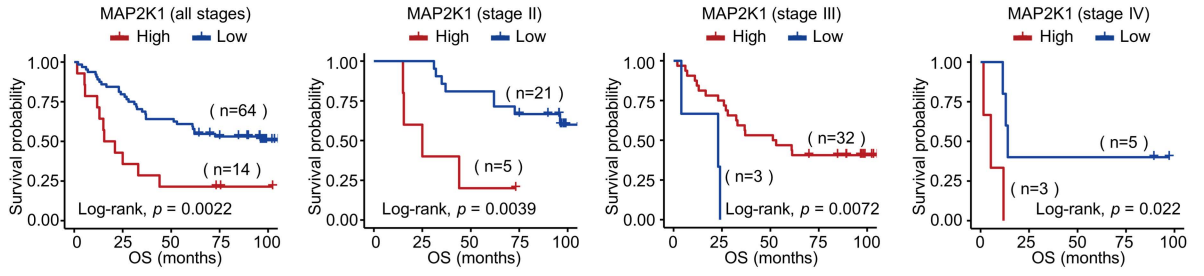

supplemental Fig. S3

A

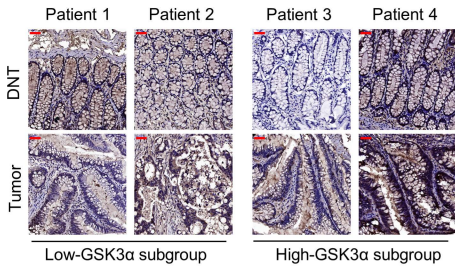

B

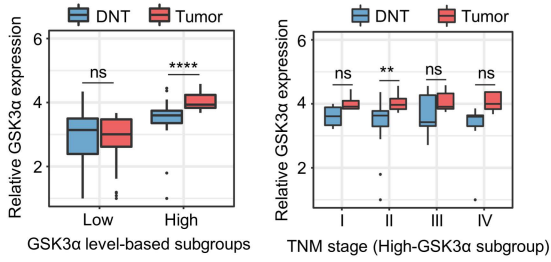

C

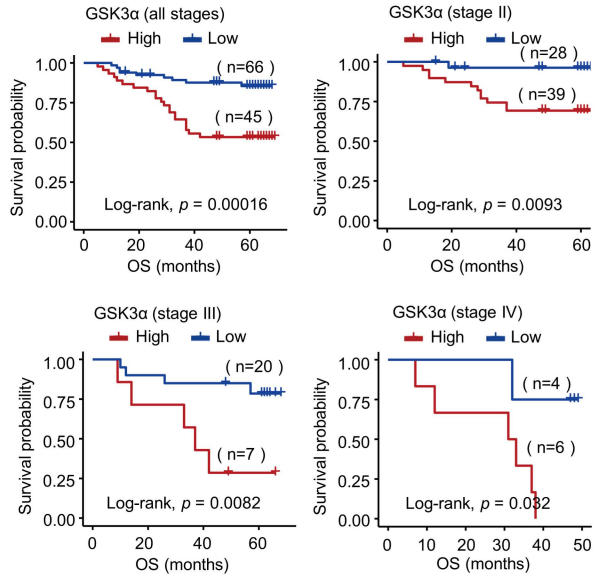

supplemental Fig. S4

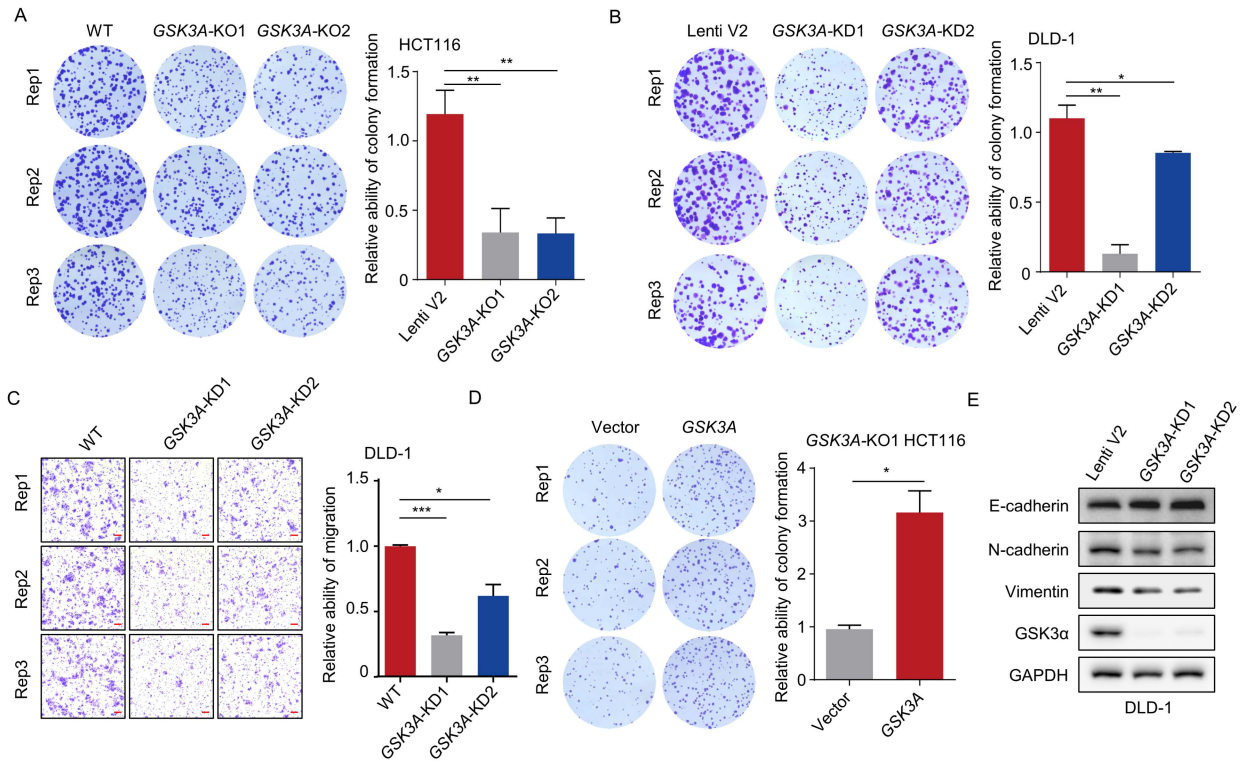

supplemental Fig. S5

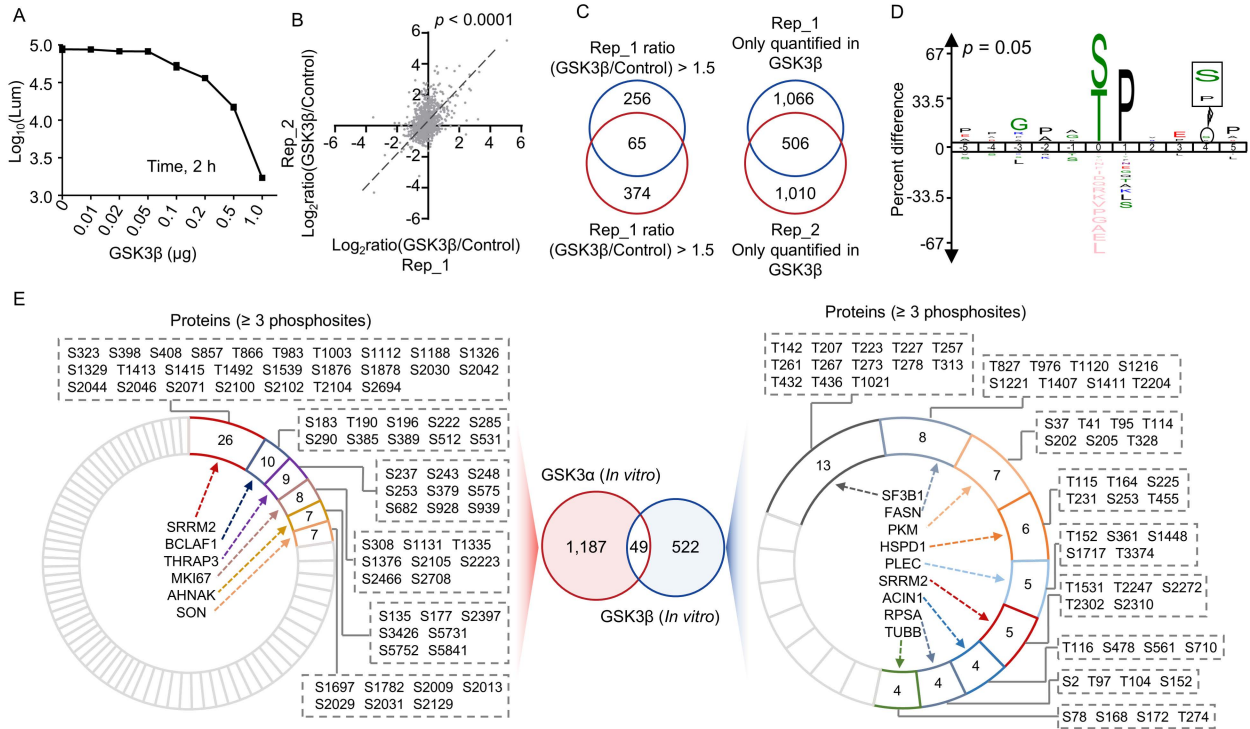

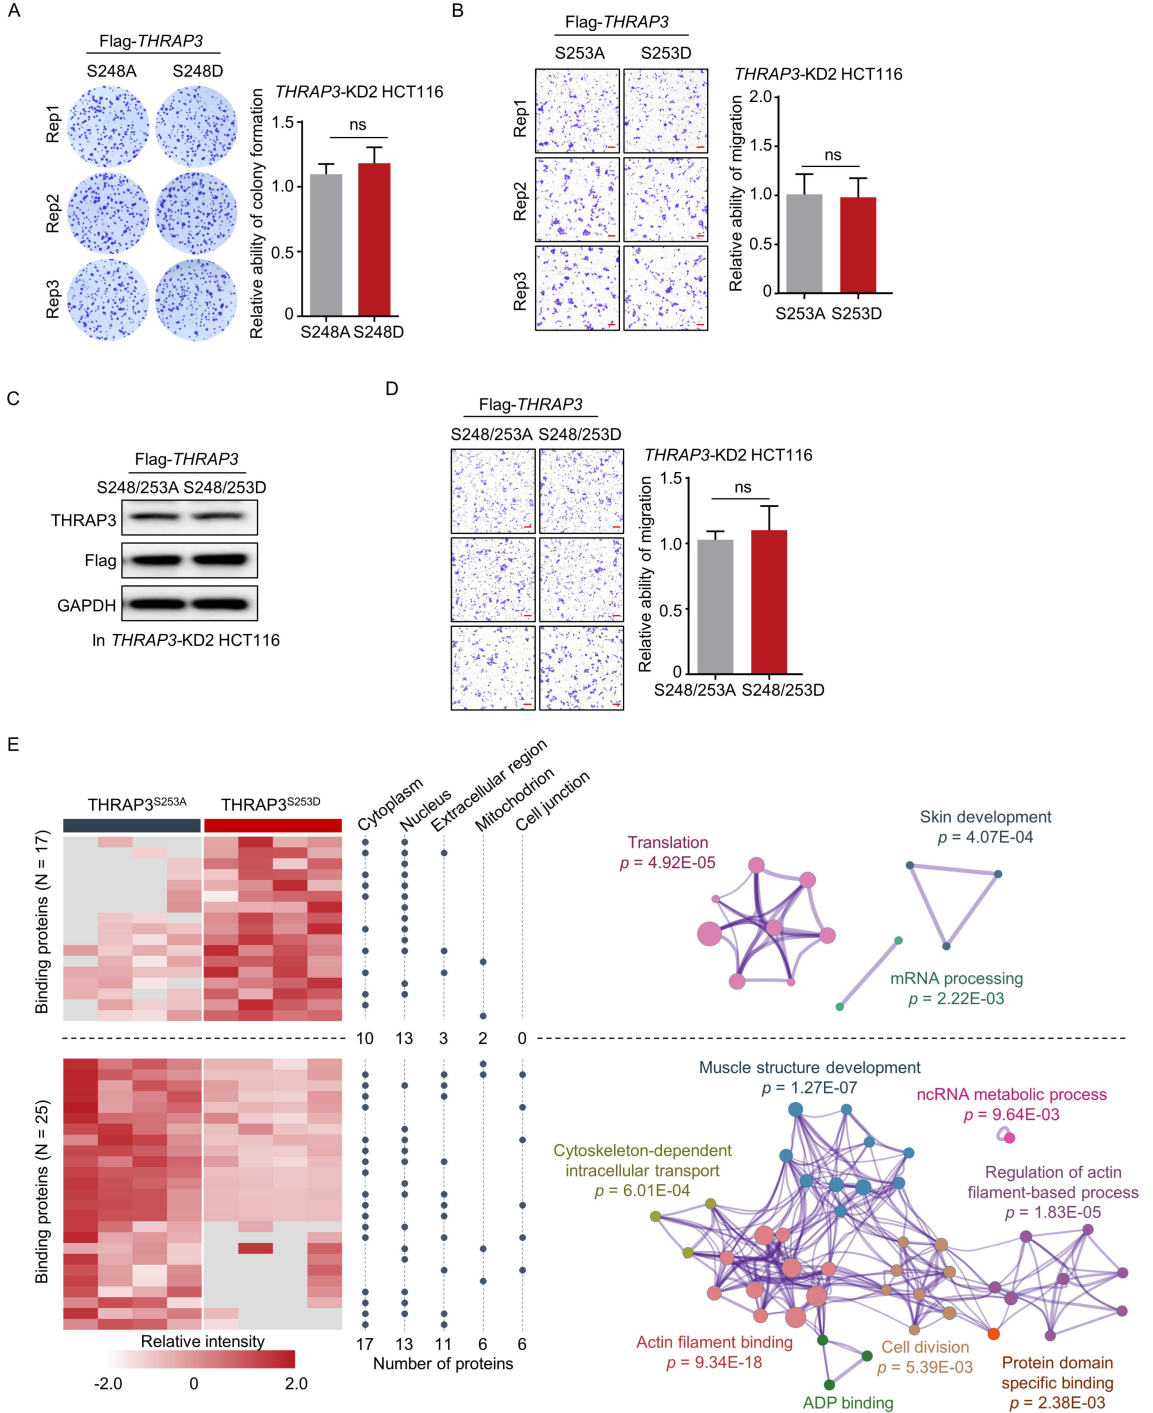

Supplement: mmc8.pdf [file mmc8.pdf]
